# Supplementary material
Source: PubMed Central journal article supplement (PMC7447985)

**Data S1. Modeling the daily fraction of the G614 variant as a function of time in local regions using isotonic regression, data related to Fig. 3** This item provides the complete set of tables as in Fig. 3A, including countries (level 2), sub-countries/states (level 3) and counties/cities (level 4). It also includes a complete set of plots for all geographic levels. Examples of 3 of these plots and descriptions of their content are provided in Fig. 3B. Some information in Fig. 3 is repeated here, so the data included in this data file constitutes a complete set.

Complete tables to support main text Fig. 3A.

| 14 countries with a clear direction, 13 increasing: p = 0.0018 |        |        |           |                  |                         |                         |
|----------------------------------------------------------------|--------|--------|-----------|------------------|-------------------------|-------------------------|
| Level 1: Country                                               | # D614 | # G614 | # of days | Time window days | G614 increasing p-value | G614 decreasing p-value |
| Australia                                                      | 449    | 563    | 62        | 90               | 0.00025                 | 1.00                    |
| Canada                                                         | 67     | 114    | 33        | 86               | 0.00025                 | 1.00                    |
| Chile                                                          | 24     | 118    | 34        | 35               | 0.00025                 | 1.00                    |
| China                                                          | 467    | 42     | 71        | 114              | 0.00025                 | 1.00                    |
| France                                                         | 16     | 272    | 54        | 85               | 0.00025                 | 1.00                    |
| India                                                          | 182    | 187    | 62        | 105              | 0.00025                 | 0.90                    |
| Japan                                                          | 74     | 28     | 26        | 92               | 0.00025                 | 0.98                    |
| Netherlands                                                    | 97     | 198    | 40        | 57               | 0.00025                 | 0.90                    |
| Spain                                                          | 126    | 206    | 40        | 45               | 0.00025                 | 0.84                    |
| Taiwan                                                         | 44     | 49     | 41        | 95               | 0.00025                 | 0.25                    |
| United-Kingdom                                                 | 3101   | 9315   | 88        | 109              | 0.00025                 | 1.00                    |
| USA                                                            | 1798   | 4233   | 93        | 114              | 0.00025                 | 0.001*                  |
| *USA excluding Santa Clara                                     | 1633   | 4209   | 93        | 114              | 0.00025                 | 1.00                    |
| Thailand                                                       | 37     | 17     | 28        | 88               | 0.0005                  | 0.77                    |
| Germany                                                        | 27     | 120    | 47        | 76               | 0.0023                  | 0.44                    |
| Denmark                                                        | 32     | 500    | 37        | 39               | 0.08                    | 0.52                    |
| Sweden                                                         | 11     | 220    | 52        | 70               | 0.09                    | 0.69                    |
| Belgium                                                        | 53     | 363    | 46        | 77               | 0.10                    | 0.24                    |
| Austria                                                        | 20     | 204    | 41        | 53               | 0.58                    | 0.38                    |
| Iceland                                                        | 126    | 366    | 28        | 31               | 0.62                    | 0.0005                  |
| Greece                                                         | 23     | 76     | 26        | 35               | 0.96                    | 0.097                   |

31 regions with a clear direction, 30 increasing:  $p = 2.98e-08$

| Level 2: Region                       | # D614 | # G614 | # of days | Time window days | G614 increasing p-value | G614 decreasing p-value |
|---------------------------------------|--------|--------|-----------|------------------|-------------------------|-------------------------|
| Australia_New-South-Wales             | 189    | 180    | 51        | 90               | 0.00025                 | 0.99                    |
| Australia_Victoria                    | 226    | 306    | 43        | 80               | 0.00025                 | 0.93                    |
| Belgium_Ghent                         | 12     | 37     | 18        | 26               | 0.00025                 | 0.77                    |
| China_Beijing                         | 46     | 25     | 35        | 66               | 0.00025                 | 0.98                    |
| Germany_North-Rhine-Westphalia        | 16     | 37     | 16        | 27               | 0.00025                 | 0.91                    |
| Spain_Comunitat-Valenciana            | 73     | 110    | 32        | 34               | 0.00025                 | 0.95                    |
| Taiwan-Taoyuan                        | 14     | 12     | 16        | 85               | 0.00025                 | 0.51                    |
| United-Kingdom_England                | 1904   | 6338   | 88        | 109              | 0.00025                 | 1.00                    |
| United-Kingdom_Scotland               | 433    | 1125   | 73        | 75               | 0.00025                 | 0.68                    |
| United-Kingdom_Wales                  | 717    | 1792   | 45        | 54               | 0.00025                 | 0.95                    |
| USA_Arizona                           | 11     | 64     | 22        | 71               | 0.00025                 | 0.99                    |
| USA_California                        | 267    | 199    | 70        | 111              | 0.00025                 | 0.001*                  |
| *USA_California excluding Santa Clara | 102    | 175    | 53        | 107              | 0.00025                 | 0.99                    |
| USA_Michigan                          | 31     | 382    | 38        | 53               | 0.00025                 | 0.85                    |
| USA_New-York                          | 91     | 1163   | 52        | 55               | 0.00025                 | 1.00                    |
| USA_Utah                              | 24     | 253    | 38        | 45               | 0.00025                 | 0.98                    |
| USA_Virginia                          | 27     | 220    | 43        | 47               | 0.00025                 | 0.99                    |
| USA_Washington                        | 926    | 683    | 69        | 101              | 0.00025                 | 1.00                    |
| USA_Wisconsin                         | 156    | 197    | 49        | 93               | 0.00025                 | 0.07                    |
| India_Maharashtra                     | 30     | 35     | 30        | 48               | 0.0005                  | 0.97                    |
| Thailand_Bangkok                      | 26     | 12     | 19        | 70               | 0.0005                  | 0.72                    |
| Chile_Santiago                        | 19     | 63     | 27        | 34               | 0.00075                 | 0.99                    |
| USA_Illinois                          | 38     | 56     | 26        | 88               | 0.00075                 | 0.98                    |
| United-Kingdom_Northern-Ireland       | 47     | 60     | 22        | 27               | 0.00325                 | 0.42                    |
| Australia_South-Australia             | 15     | 58     | 23        | 32               | 0.0035                  | 0.84                    |
| USA_Minnesota                         | 51     | 96     | 35        | 47               | 0.004                   | 0.76                    |
| Taiwan_Taipei                         | 17     | 26     | 26        | 94               | 0.0053                  | 0.45                    |
| Australia_Queensland                  | 12     | 13     | 14        | 58               | 0.0058                  | 0.96                    |
| USA_Florida                           | 11     | 35     | 18        | 69               | 0.009                   | 0.82                    |
| USA_Connecticut                       | 22     | 127    | 34        | 71               | 0.0095                  | 0.93                    |
| Belgium_Liege                         | 19     | 140    | 24        | 44               | 0.016                   | 0.47                    |
| Denmark_Unknown                       | 32     | 493    | 34        | 34               | 0.026                   | 0.56                    |
| Canada_Ontario                        | 26     | 32     | 15        | 57               | 0.062                   | 0.91                    |
| India_Gujarat                         | 10     | 110    | 22        | 36               | 0.085                   | 0.08                    |
| Austria_Vienna                        | 10     | 108    | 33        | 41               | 0.12                    | 0.53                    |
| Spain_Madrid                          | 20     | 56     | 16        | 33               | 0.15                    | 0.89                    |
| Netherlands_Noord-Brabant             | 44     | 32     | 18        | 23               | 0.21                    | 0.64                    |
| USA_Texas                             | 75     | 169    | 29        | 53               | 0.26                    | 0.72                    |
| Netherlands_Zuid-Holland              | 15     | 75     | 23        | 29               | 0.28                    | 0.69                    |
| Netherlands_Utrecht                   | 18     | 52     | 31        | 55               | 0.30                    | 0.54                    |
| India_Delhi                           | 24     | 13     | 16        | 32               | 0.93                    | 0.00075                 |

19 cities with a clear direction, 17 increasing:  $p = 0.0007$

| Level 3: County/City                | # D614 | # G614 | # of days | Time window days | G614 increasing p-value | G614 decreasing p-value |
|-------------------------------------|--------|--------|-----------|------------------|-------------------------|-------------------------|
| Australia_New-South-Wales_Sydney    | 189    | 179    | 51        | 90               | 0.00025                 | 1.00                    |
| Spain_Comunitat-Valenciana_Valencia | 72     | 97     | 30        | 34               | 0.00025                 | 0.64                    |
| United-Kingdom_England_Bristol      | 240    | 629    | 35        | 37               | 0.00025                 | 0.28                    |
| United-Kingdom_England_Cambridge    | 751    | 3020   | 81        | 81               | 0.00025                 | 1.00                    |
| United-Kingdom_England_Liverpool    | 97     | 484    | 46        | 45               | 0.00025                 | 0.71                    |
| United-Kingdom_England_Nottingham   | 204    | 386    | 67        | 76               | 0.00025                 | 0.99                    |
| United-Kingdom_England_Sheffield    | 120    | 431    | 44        | 51               | 0.00025                 | 1.00                    |
| USA_Washington_King                 | 173    | 75     | 58        | 69               | 0.00025                 | 0.99                    |
| USA_Washington_Pierce               | 32     | 35     | 21        | 38               | 0.00025                 | 1.00                    |
| USA_Washington_Snohomish            | 35     | 32     | 27        | 93               | 0.00025                 | 1.00                    |
| USA_Wisconsin_Milwaukee             | 66     | 30     | 32        | 45               | 0.00025                 | 0.97                    |
| United-Kingdom_England_Norwich      | 29     | 269    | 26        | 28               | 0.00075                 | 0.97                    |
| USA_California_San-Diego            | 11     | 75     | 33        | 58               | 0.002                   | 0.95                    |
| United-Kingdom_England_London       | 36     | 357    | 19        | 24               | 0.0085                  | 0.91                    |
| USA_Wisconsin_Madison               | 13     | 43     | 26        | 35               | 0.030                   | 0.39                    |
| USA_New-York_Manhattan              | 38     | 339    | 30        | 45               | 0.036                   | 0.90                    |
| USA_California_San-Francisco        | 59     | 83     | 21        | 48               | 0.049                   | 0.34                    |
| USA_New-York_Brooklyn               | 13     | 292    | 31        | 46               | 0.070                   | 0.87                    |
| USA_Washington_Yakima               | 184    | 59     | 31        | 36               | 0.073                   | 0.00025                 |
| USA_California_Santa-Clara          | 165    | 24     | 50        | 76               | 0.49                    | 0.00025                 |

# D614 to G614 Transitions Over Time by Country part 1

USA

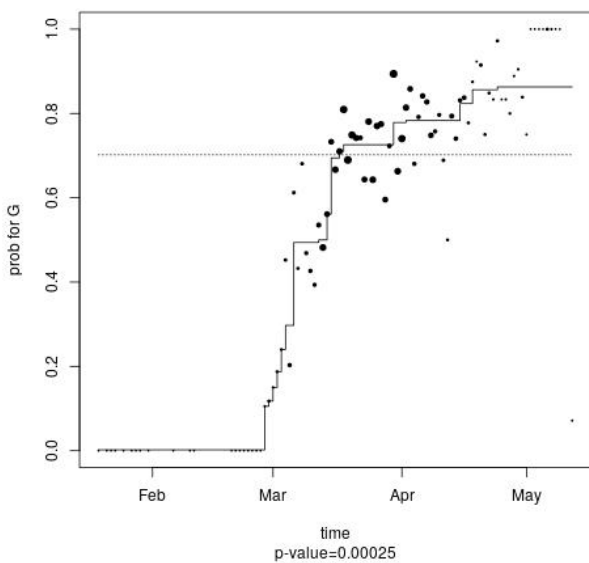

United-Kingdom

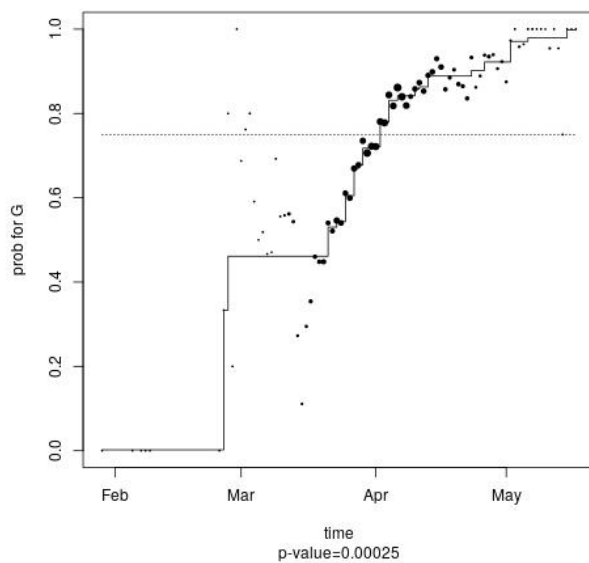

Thailand

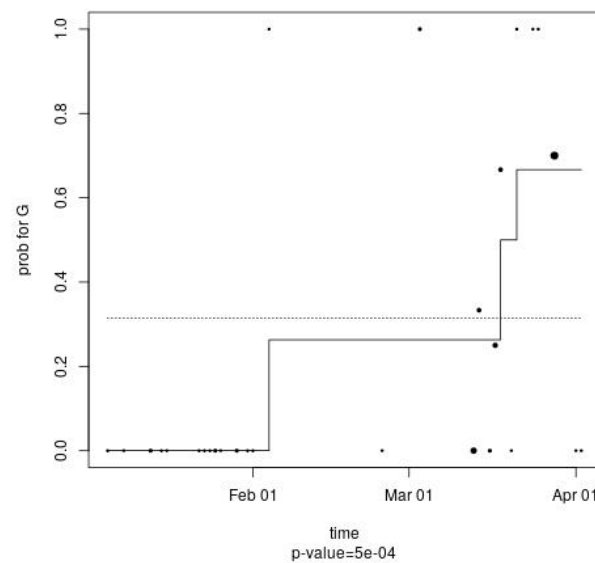

Taiwan

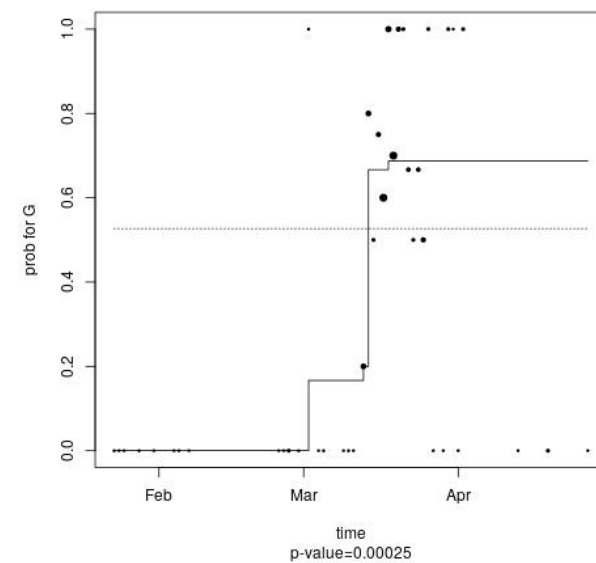

Sweden

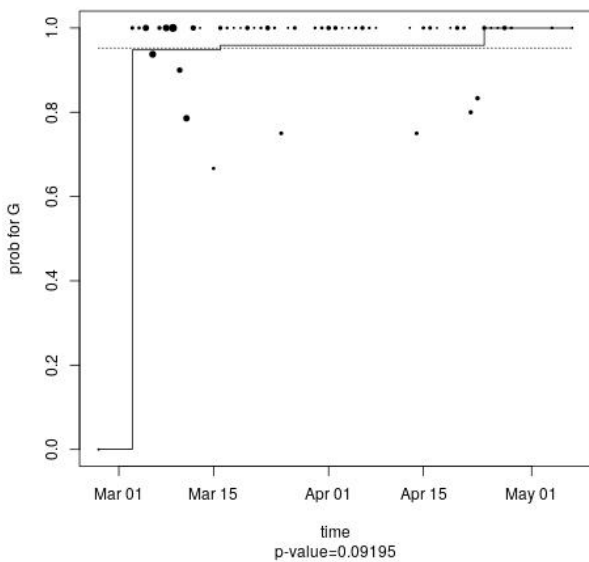

Spain

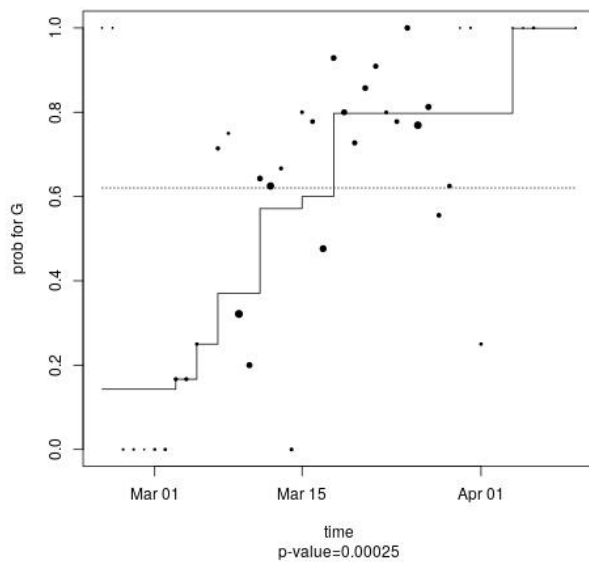

Netherlands

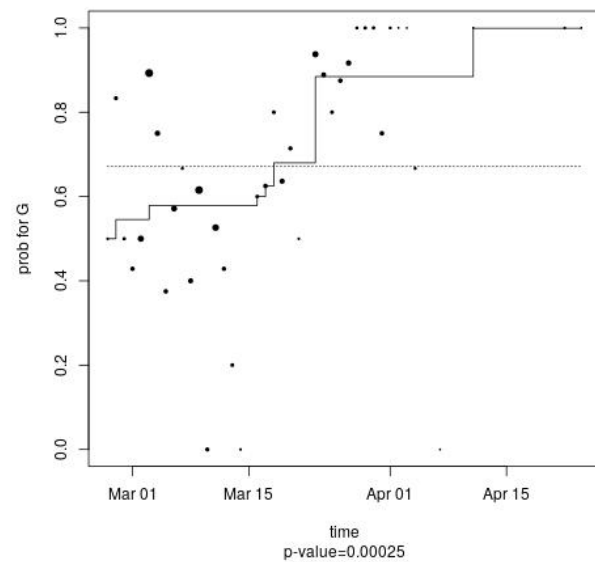

Japan

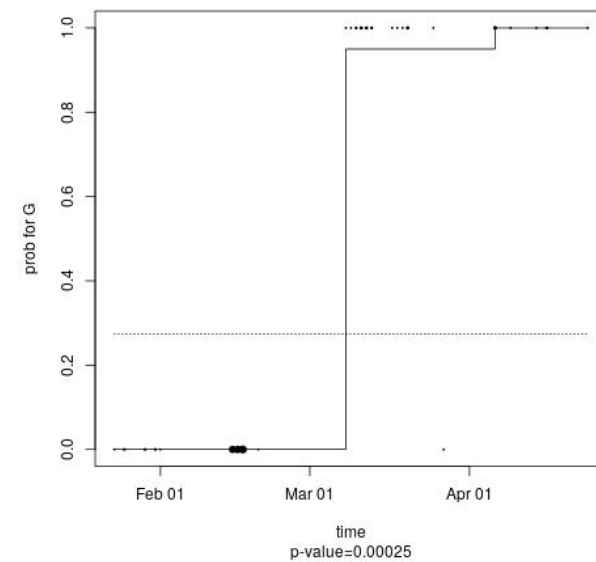

# D614 to G614 Transitions Over Time by Country part 2

**India**

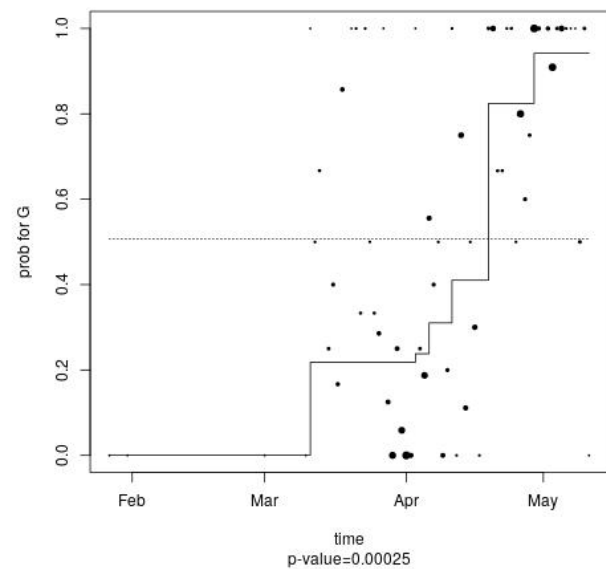

**Iceland**

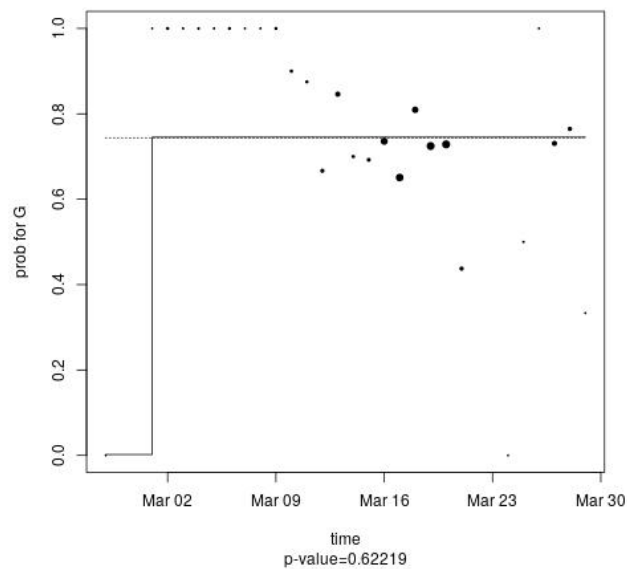

**Greece**

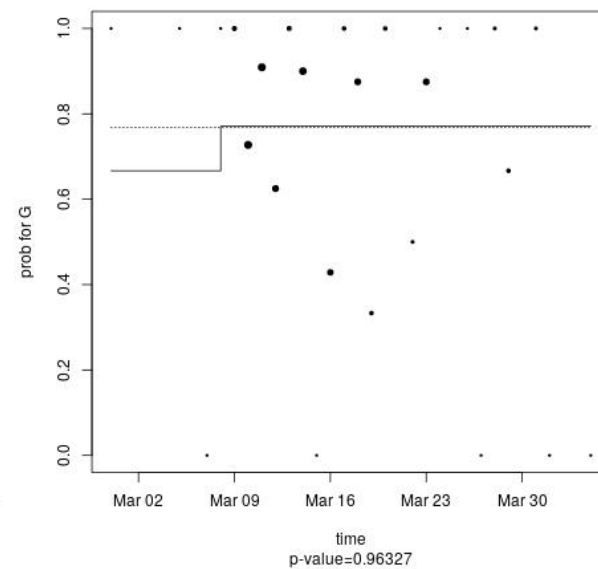

**Germany**

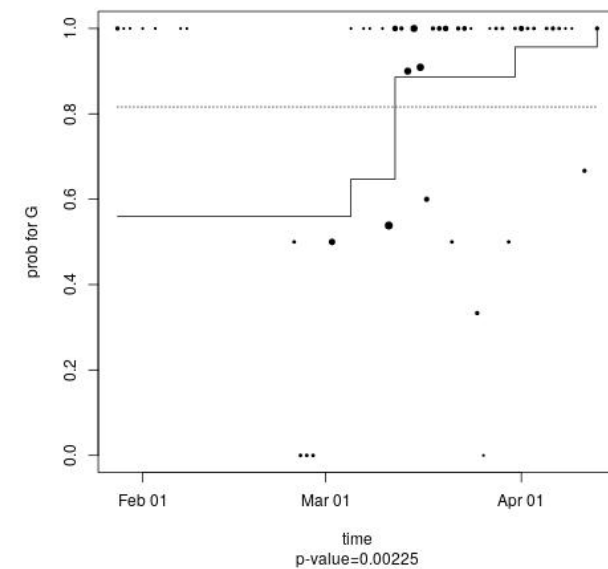

**France**

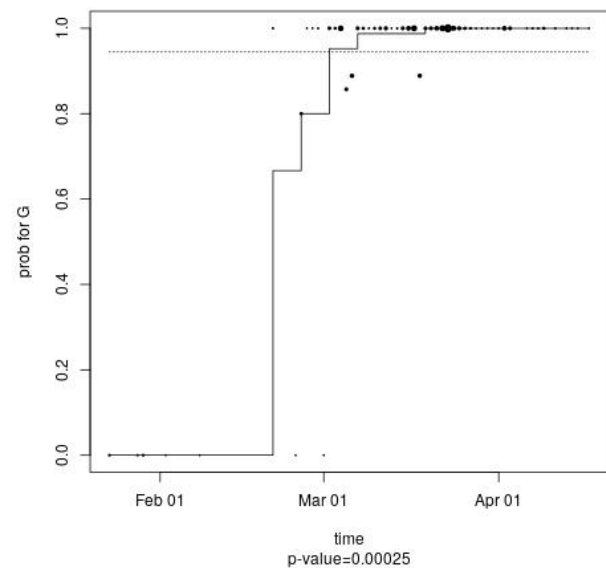

**Denmark**

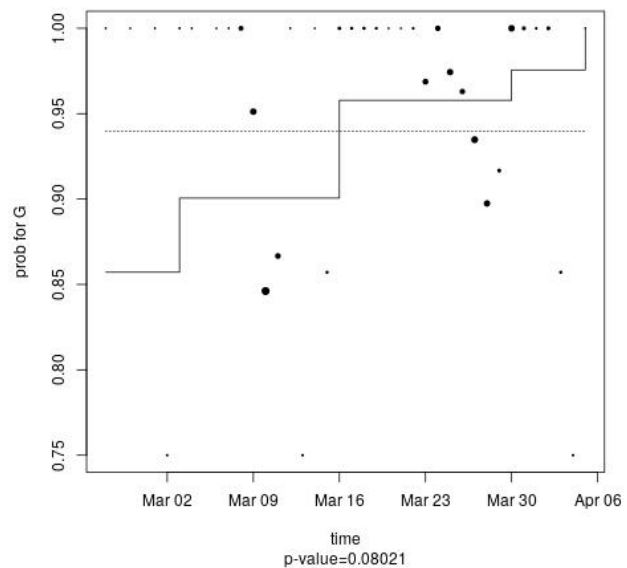

**China**

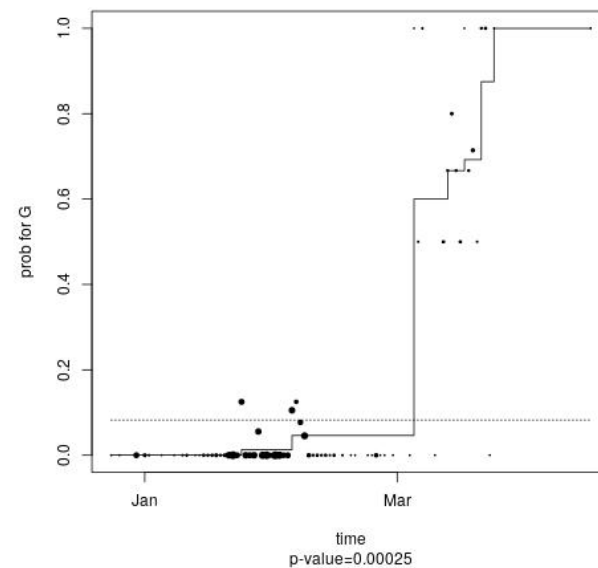

**Chile**

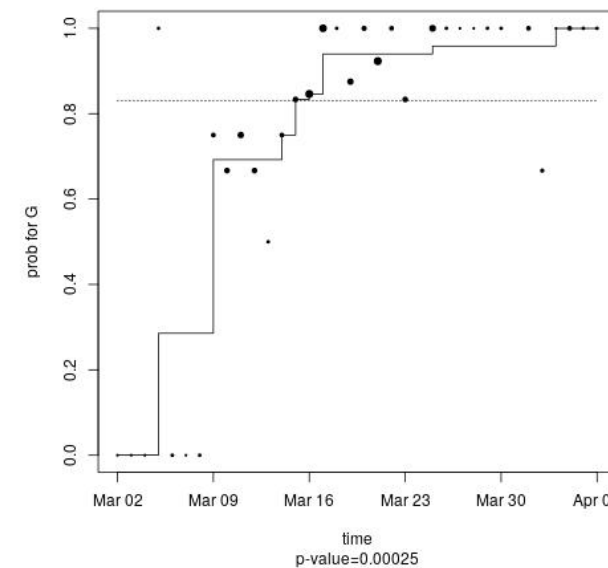

# D614 to G614 Transitions Over Time by Country part 3

Canada

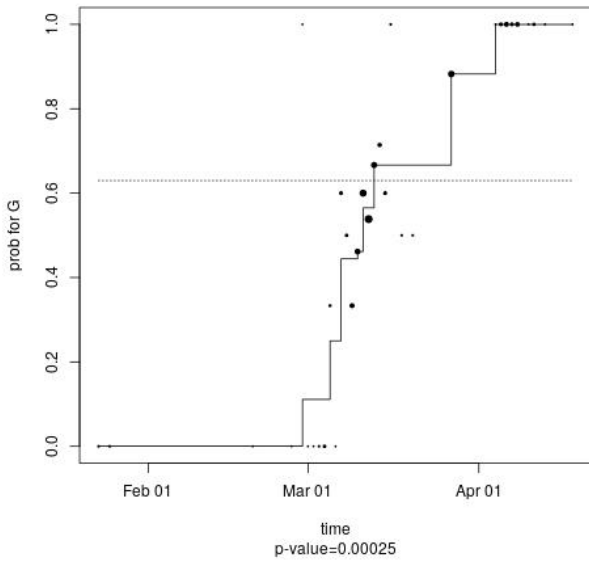

Belgium

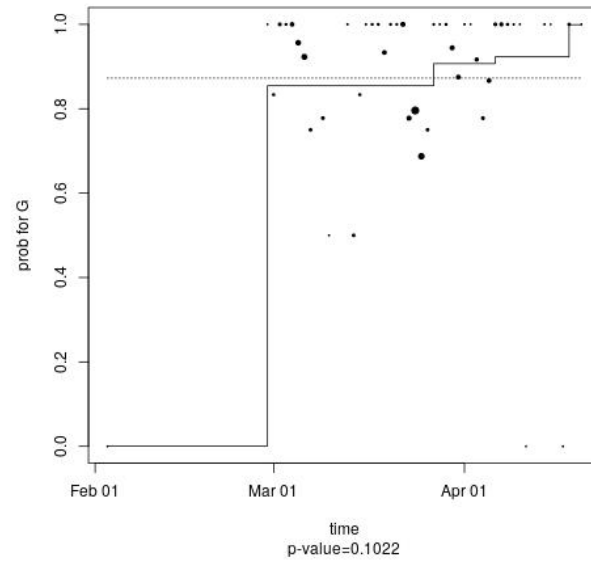

Austria

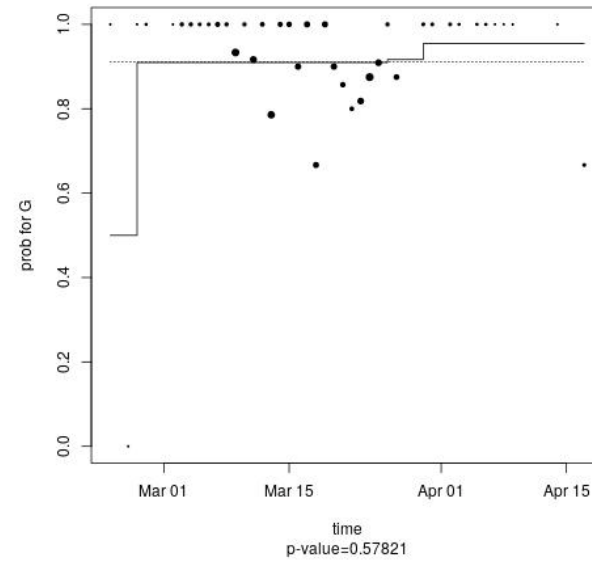

Australia

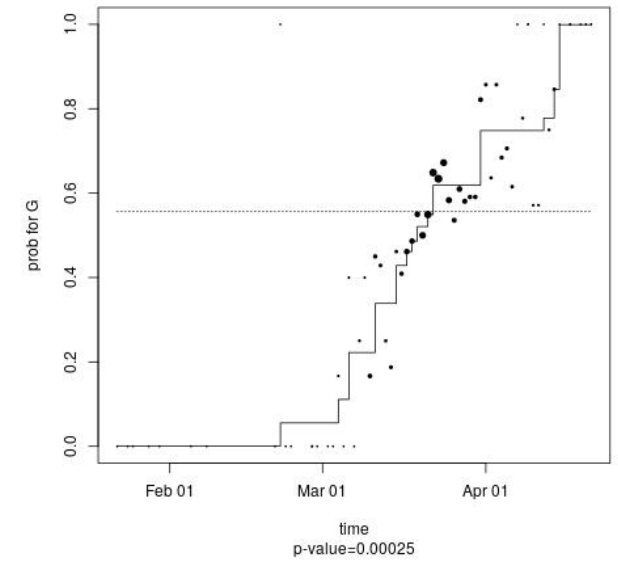

# D614 to G614 Transitions Over Time by Region part 1

**USA\_Wisconsin**

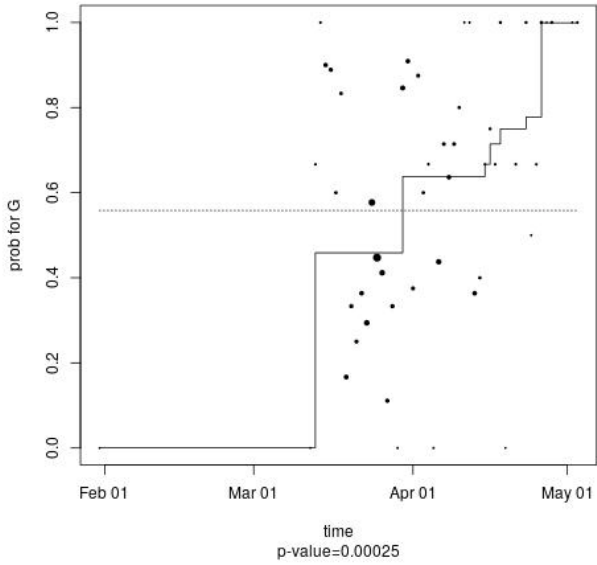

**USA\_Washington**

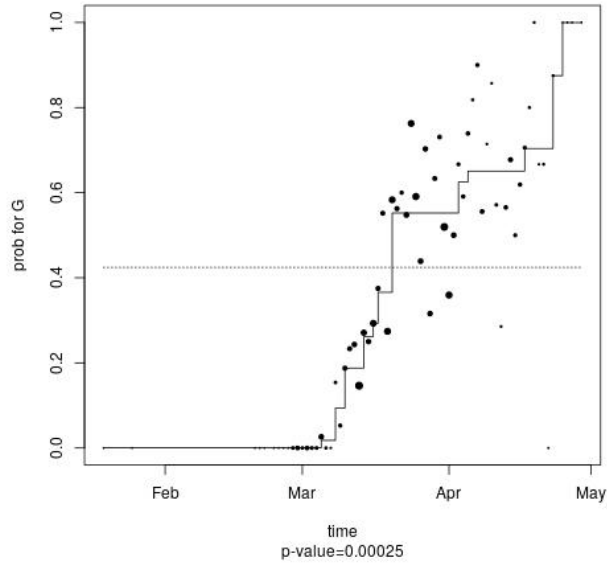

**USA\_Virginia**

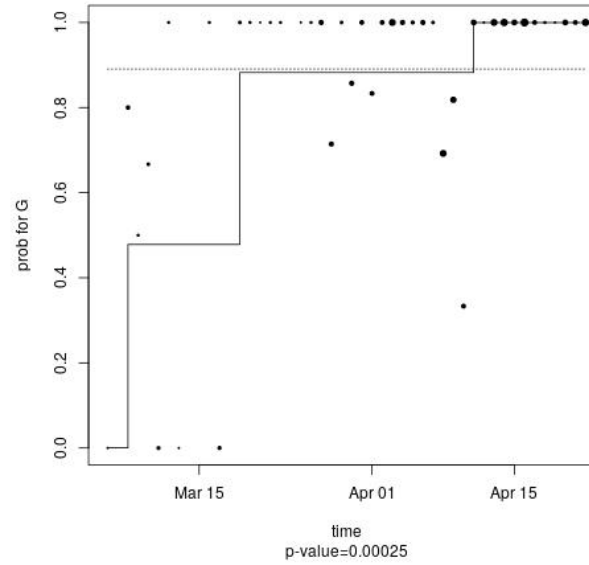

**USA\_Utah**

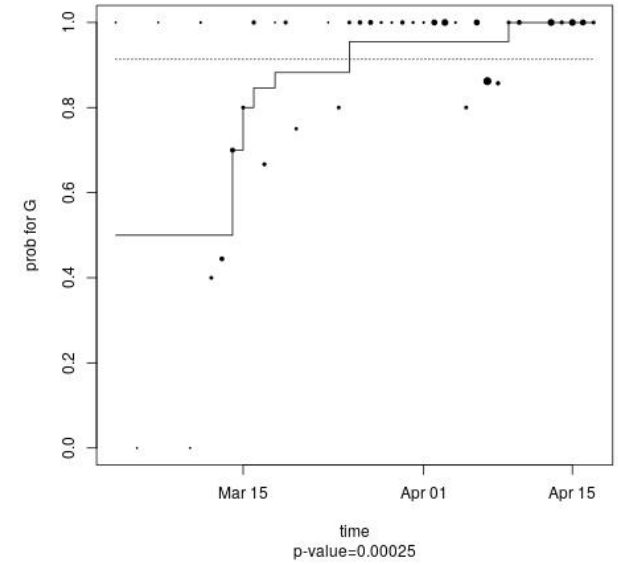

**USA\_Texas**

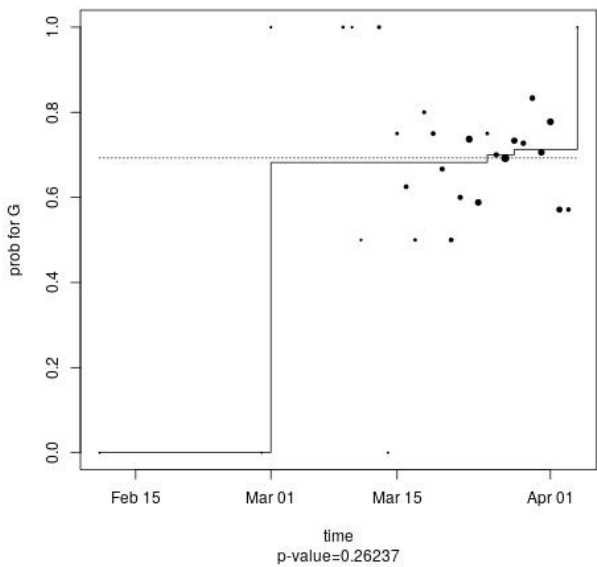

**USA\_New-York**

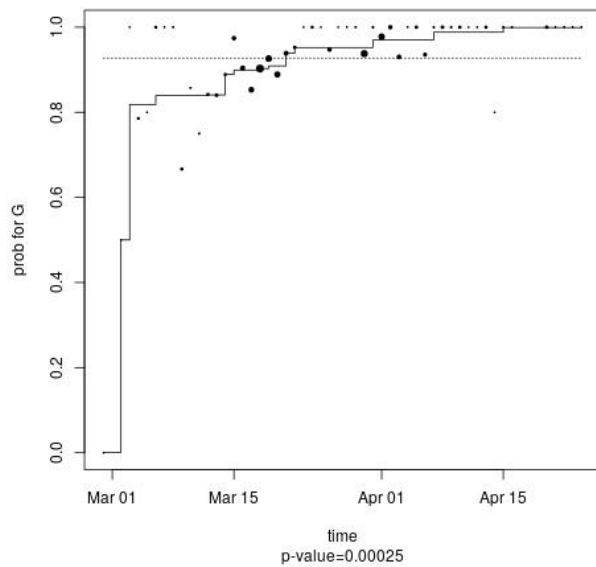

**USA\_Minnesota**

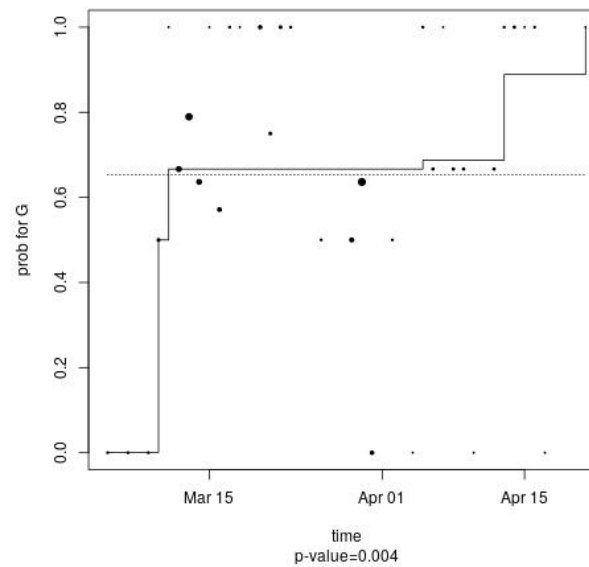

**USA\_Michigan**

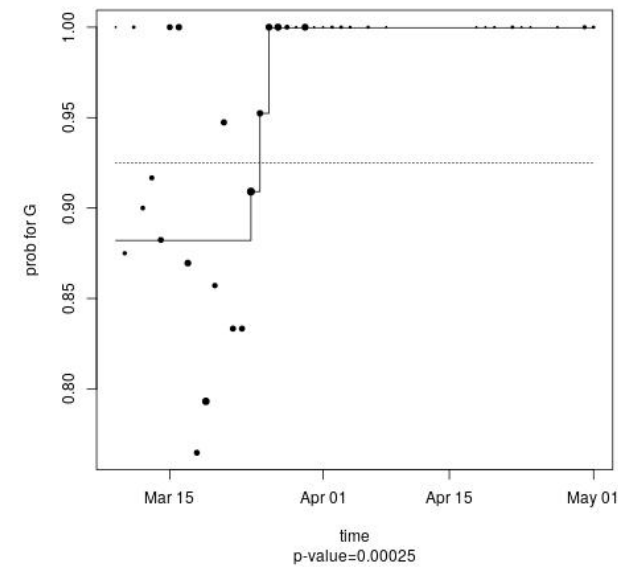



# D614 to G614 Transitions Over Time by Region part 2

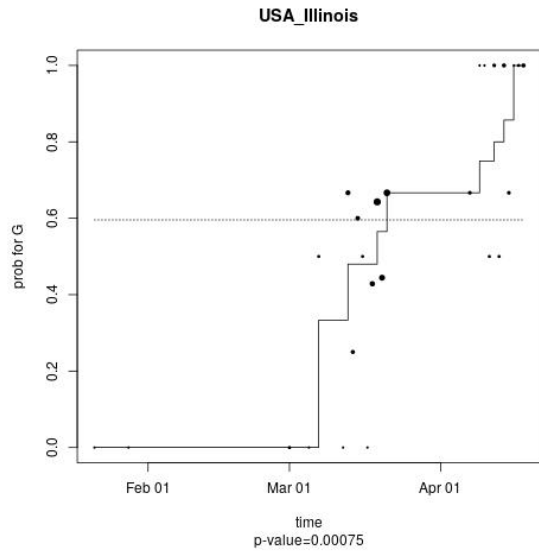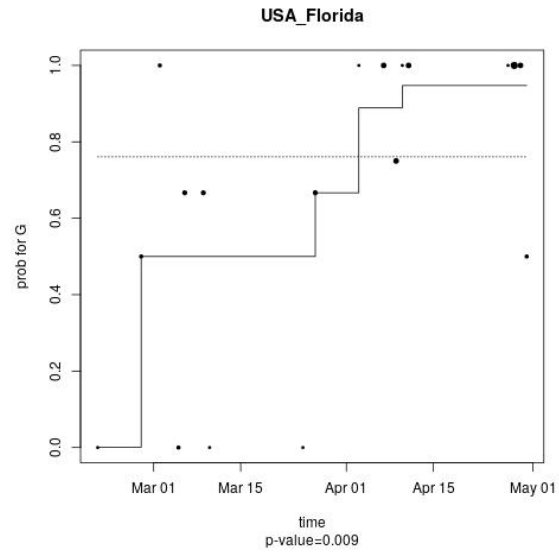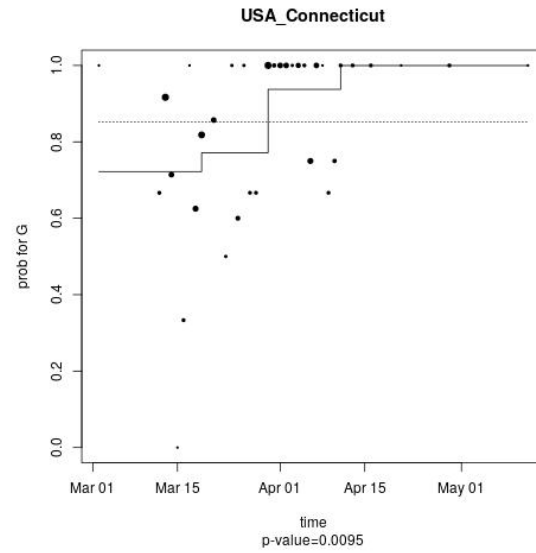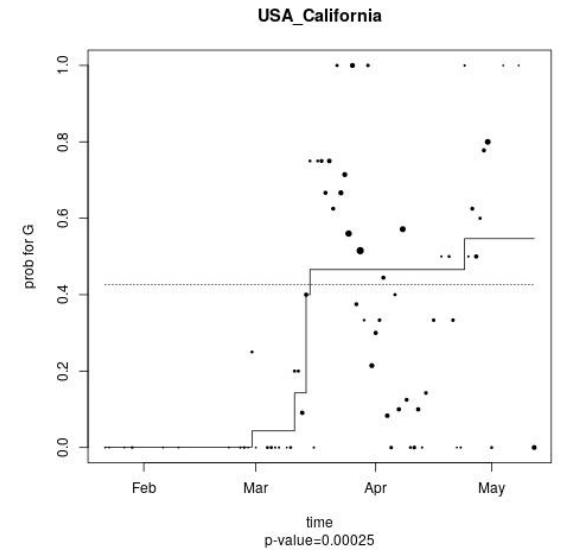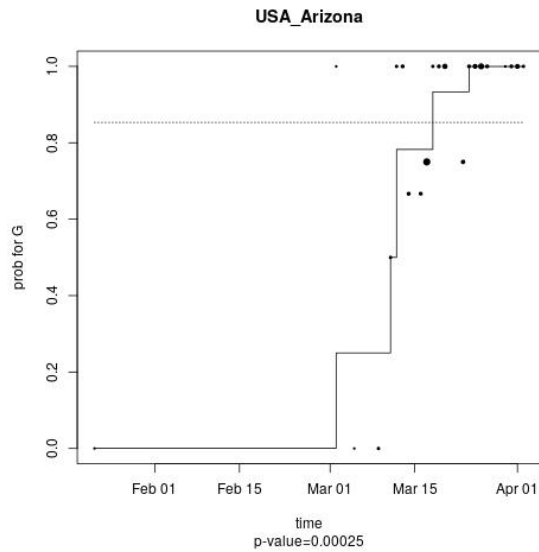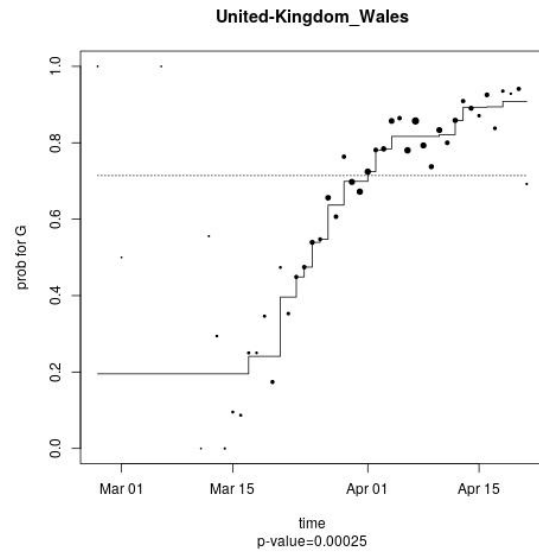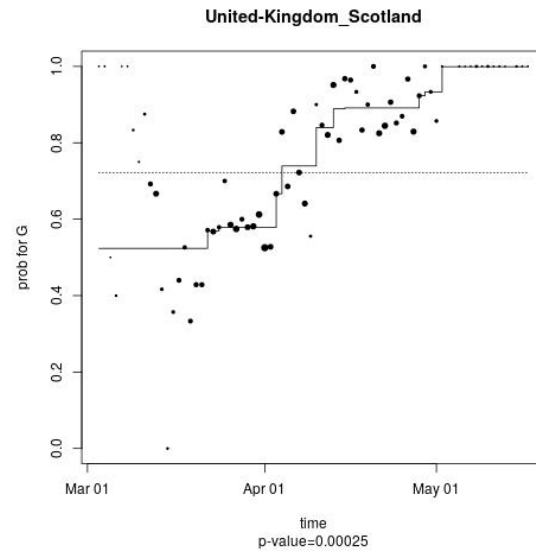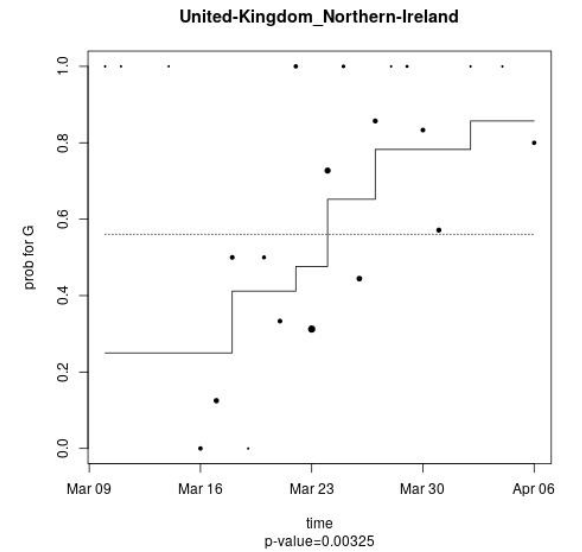

# D614 to G614 Transitions Over Time by Region part 3

United-Kingdom\_England

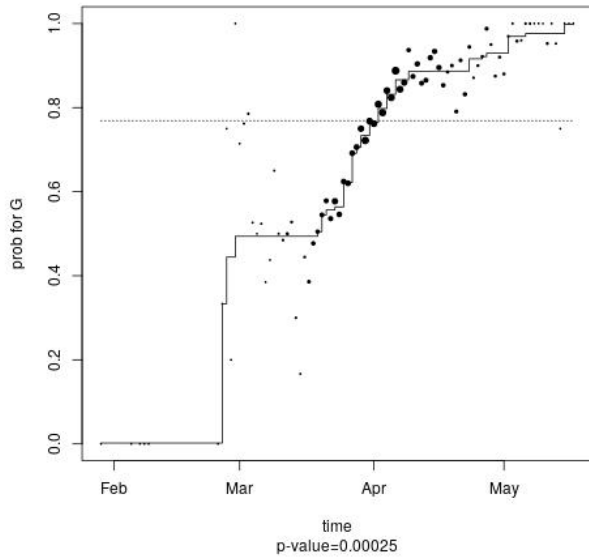

Thailand\_Bangkok

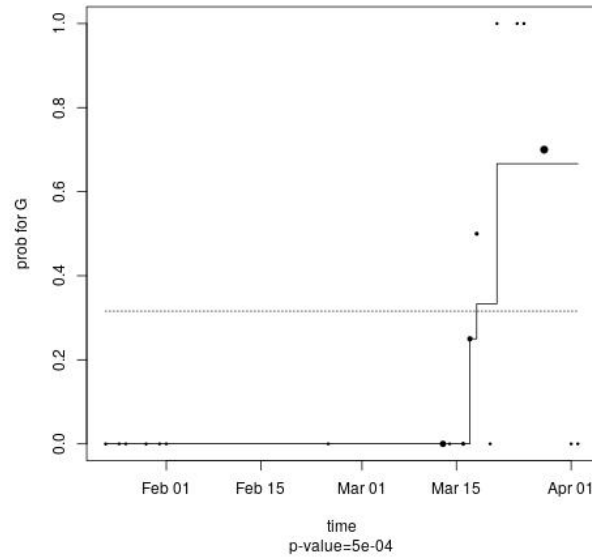

Taiwan-Taoyuan

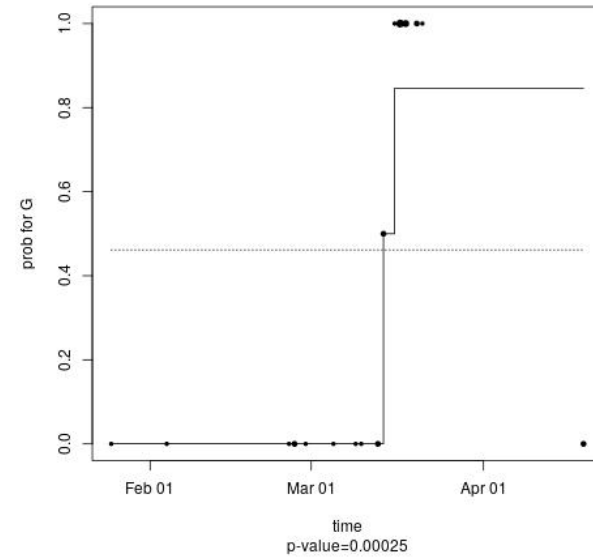

Taiwan\_Taipei

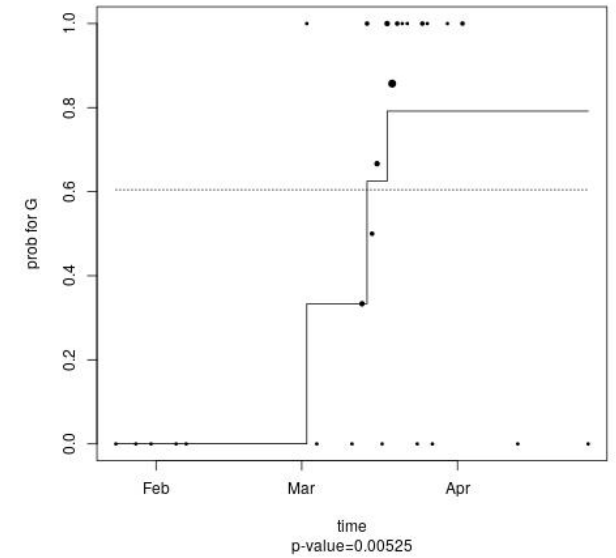

Spain\_Madrid

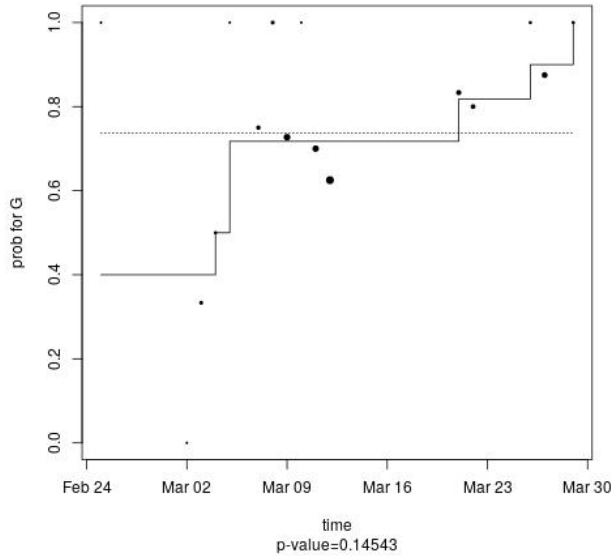

Spain\_Comunitat-Valenciana

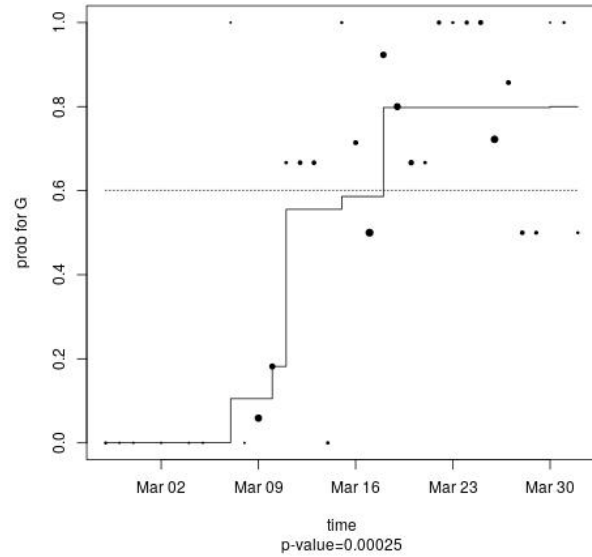

Netherlands\_Zuid-Holland

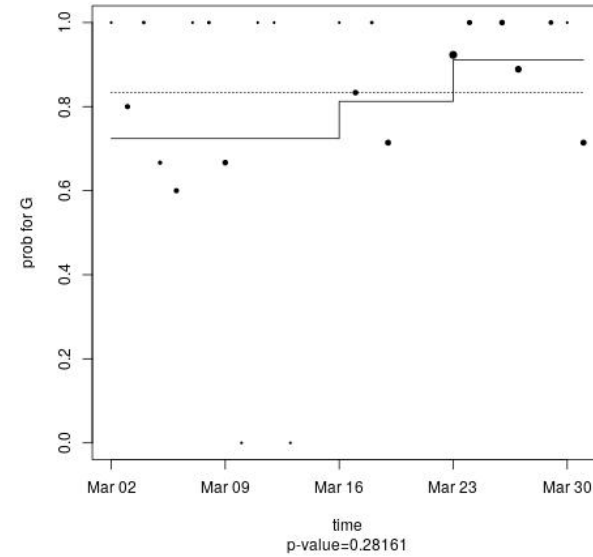

Netherlands\_Utrecht

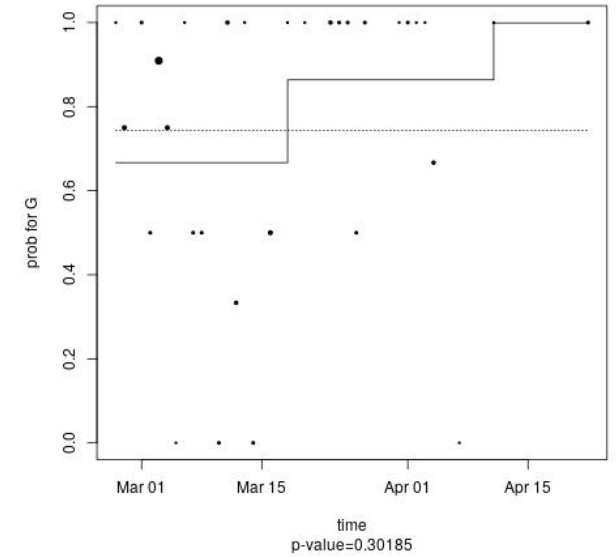

# D614 to G614 Transitions Over Time by Region part 4

Netherlands\_Noord-Brabant

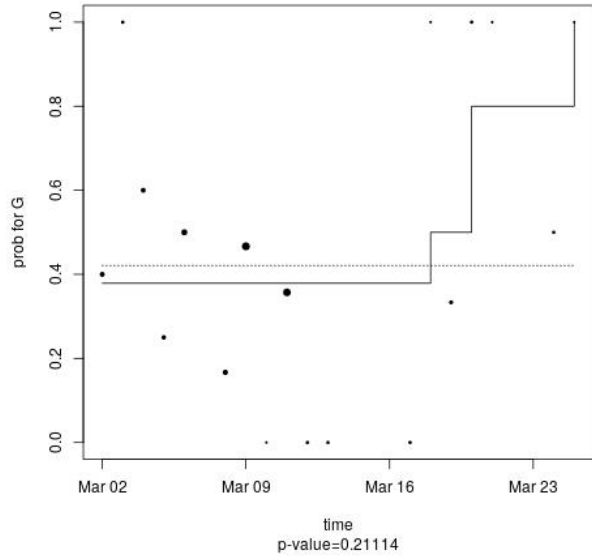

India\_Maharashtra

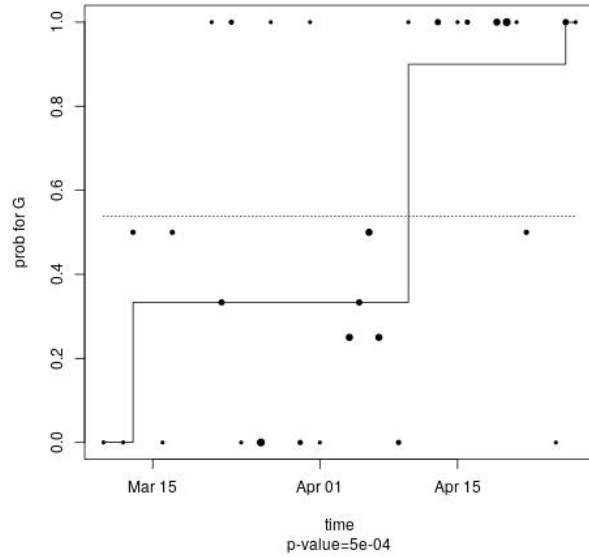

India\_Gujarat

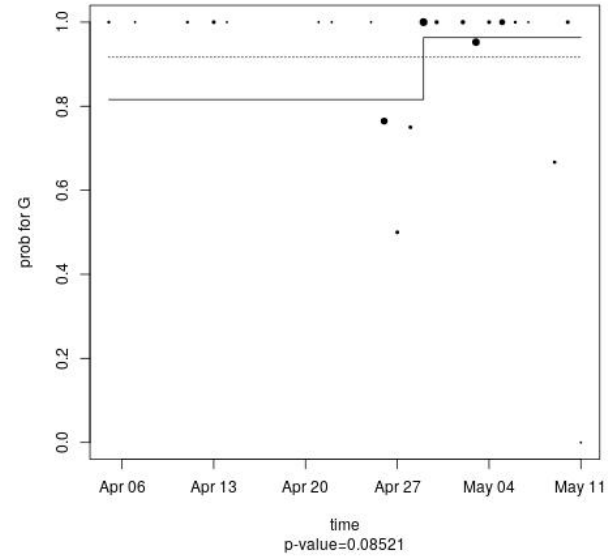

India\_Delhi

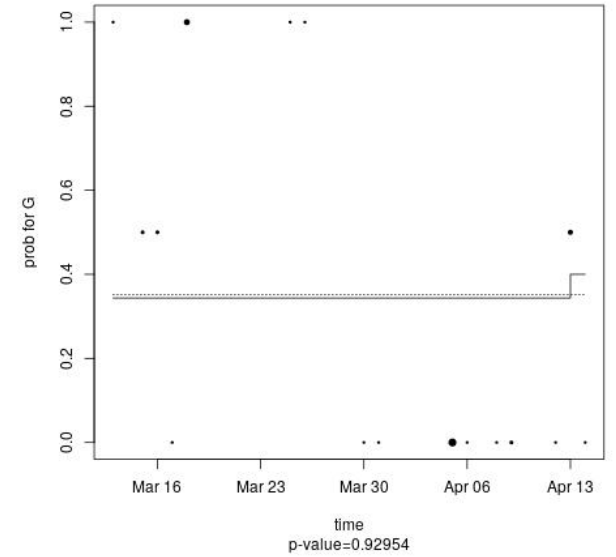

Iceland\_Reykjavik

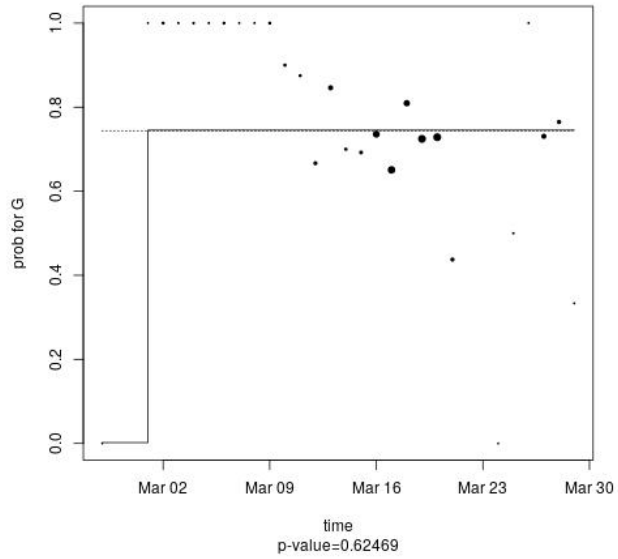

Greece\_Athens

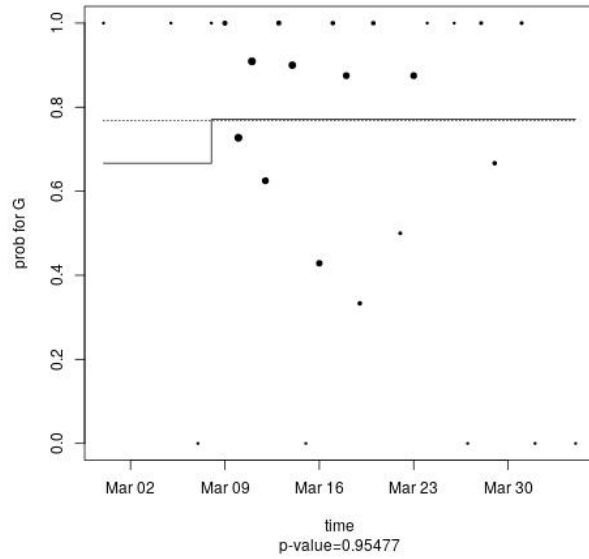

Germany\_North-Rhine-Westphalia

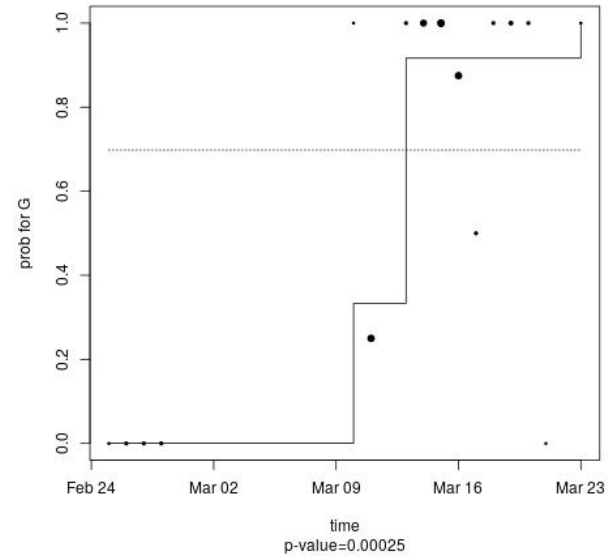

Denmark\_Unknown

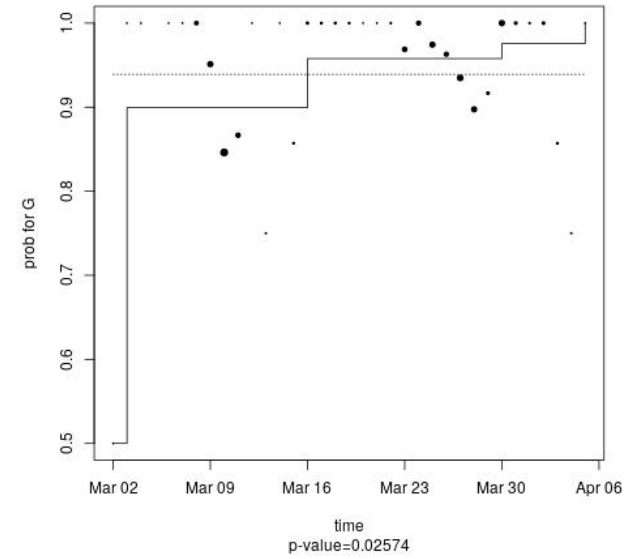

# D614 to G614 Transitions Over Time by Region part 5

China\_Beijing

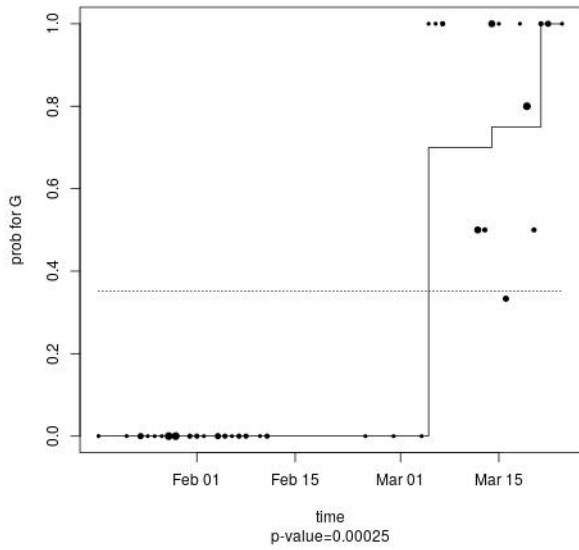

Chile\_Santiago

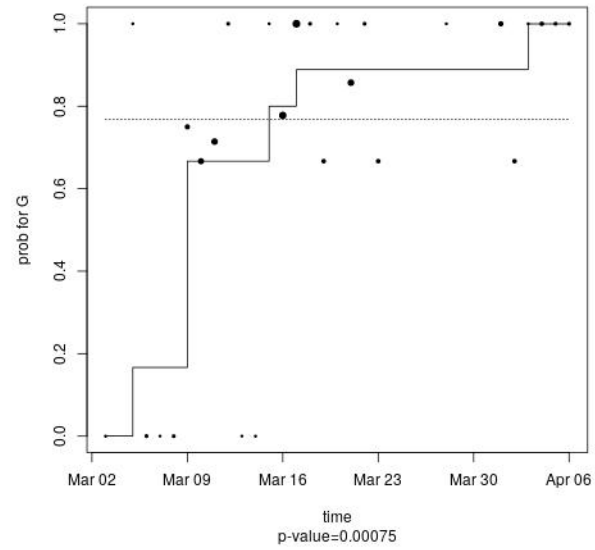

Canada\_Ontario

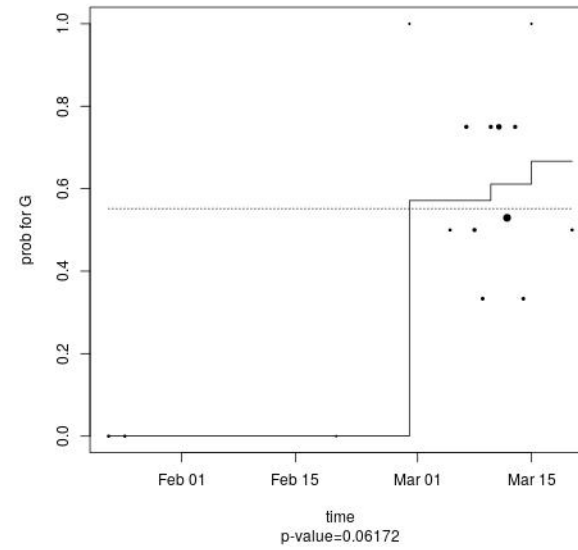

Belgium\_Liege

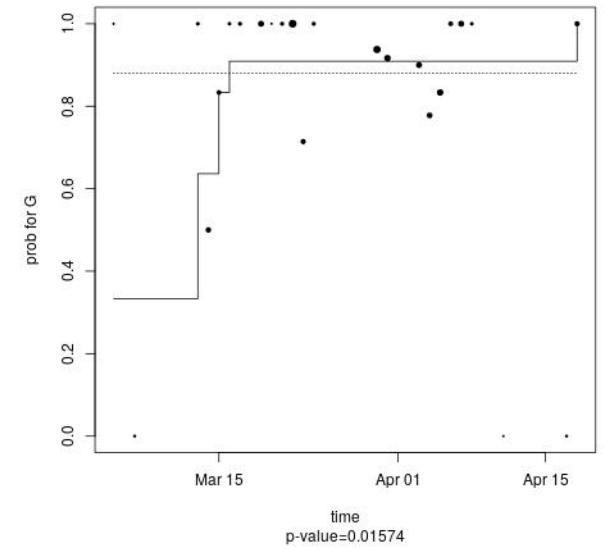

Belgium\_Ghent

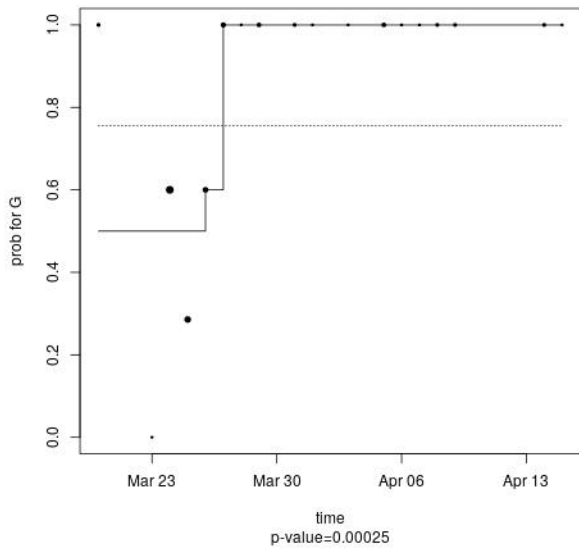

Austria\_Vienna

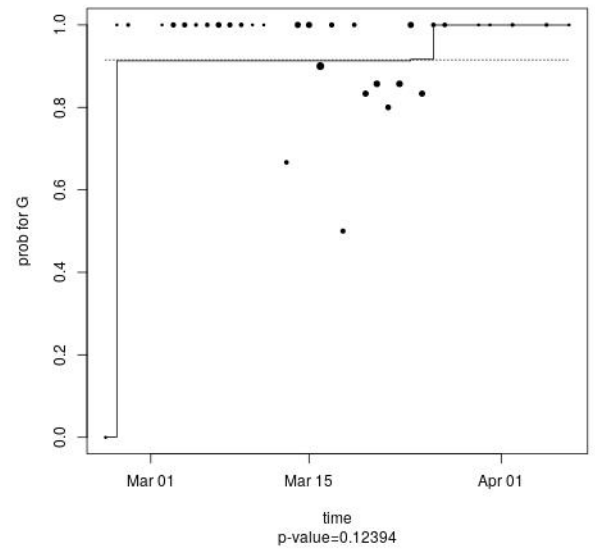

Australia\_Victoria

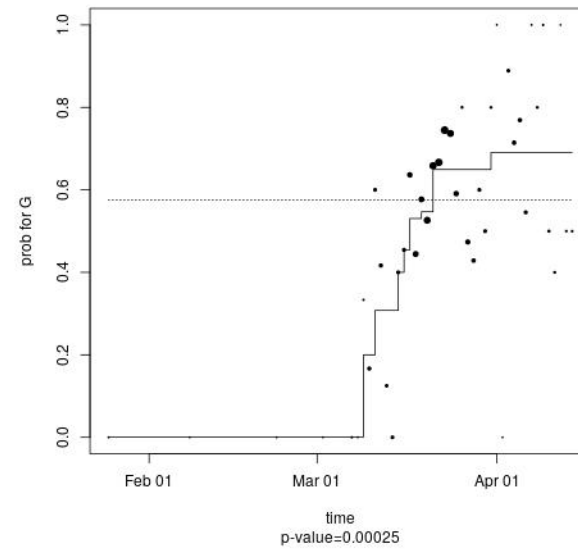

Australia\_South-Australia

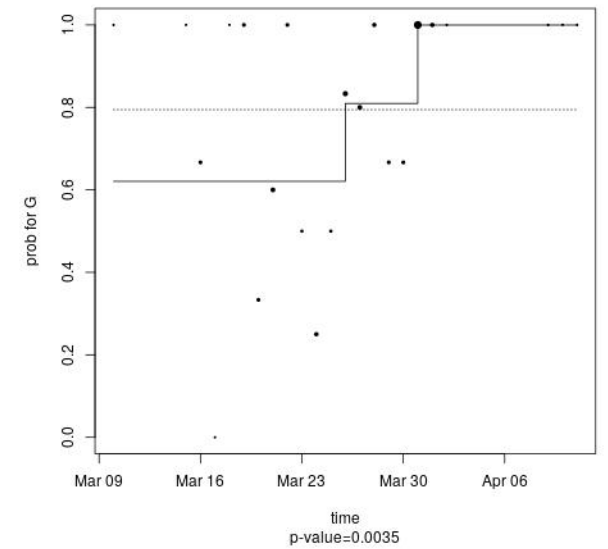

# D614 to G614 Transitions Over Time by Region part 6

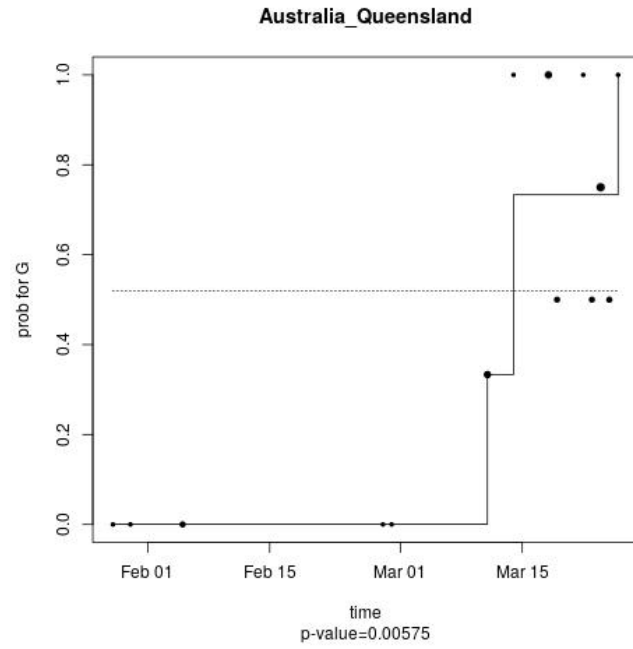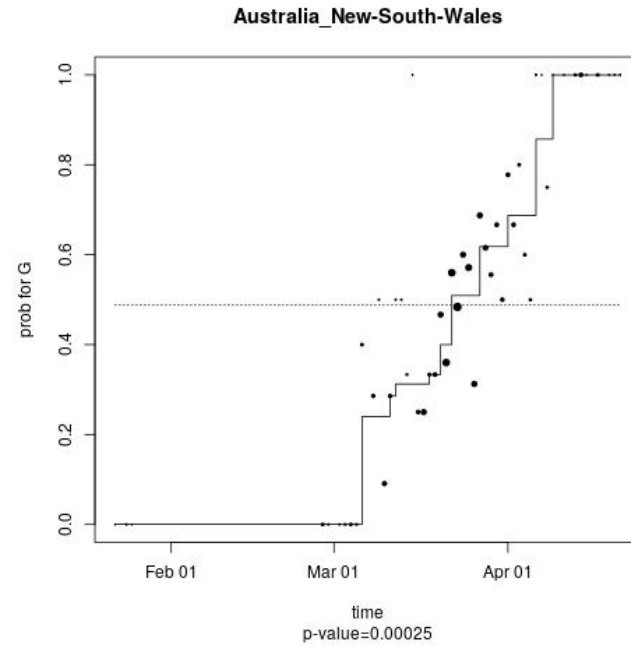

# D614 to G614 Transitions Over Time by City Part 1

USA\_Wisconsin\_Milwaukee

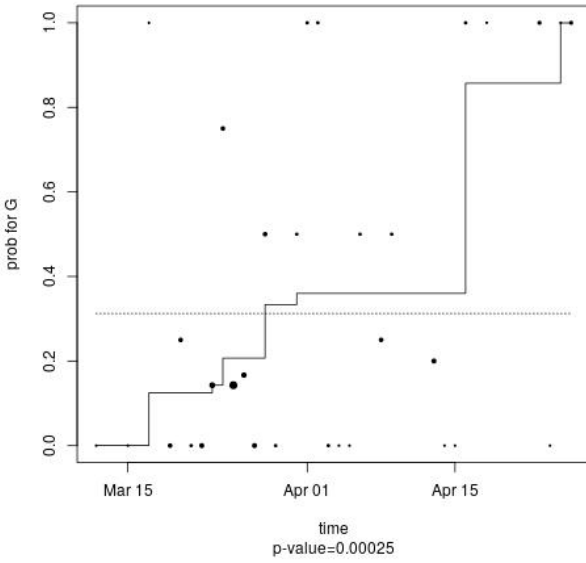

USA\_Wisconsin\_Madison

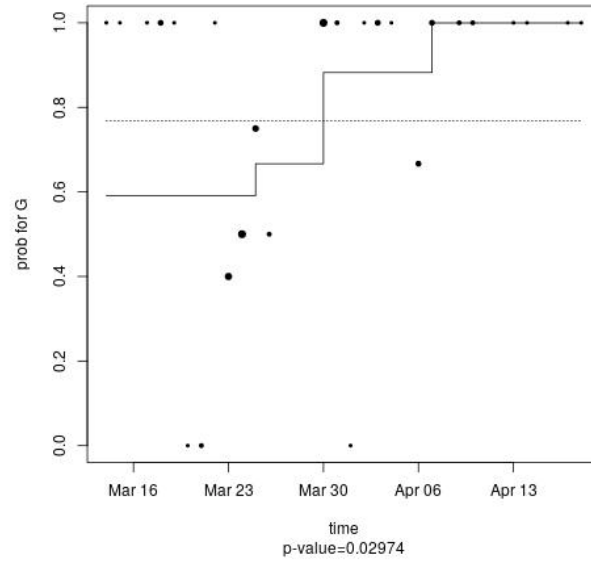

USA\_Washington\_Yakima

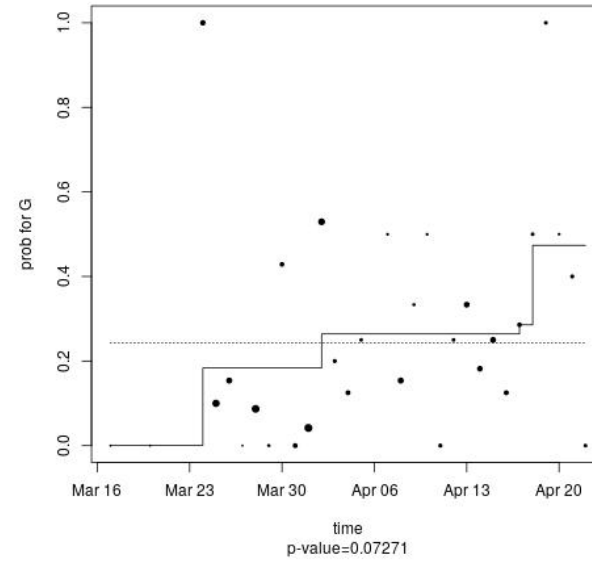

USA\_Washington\_Snohomish

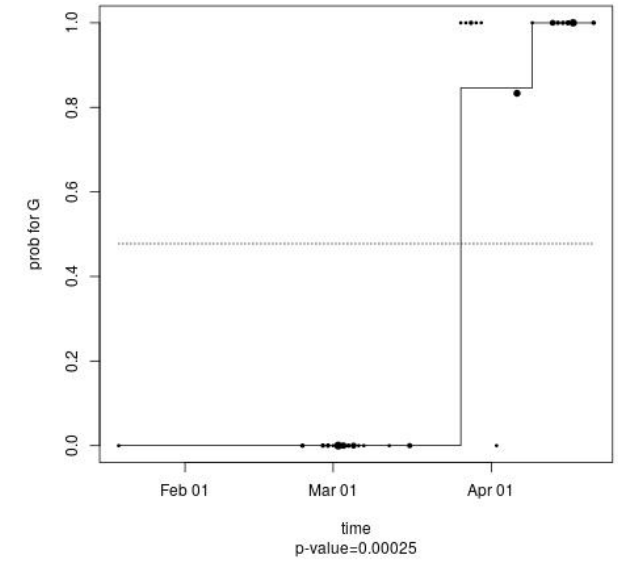

USA\_Washington\_Pierce

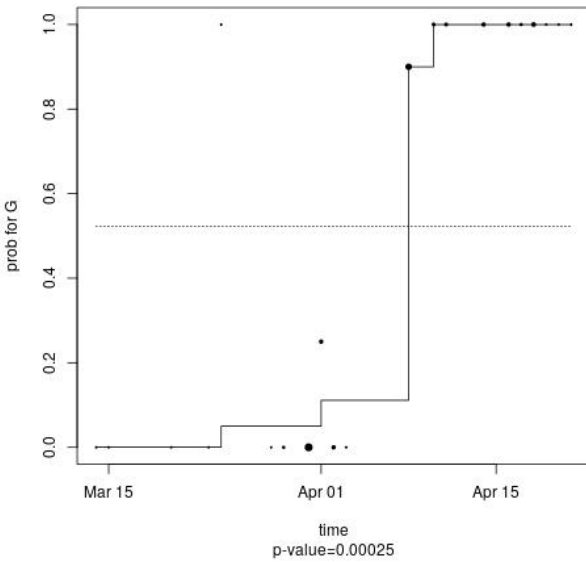

USA\_Washington\_King

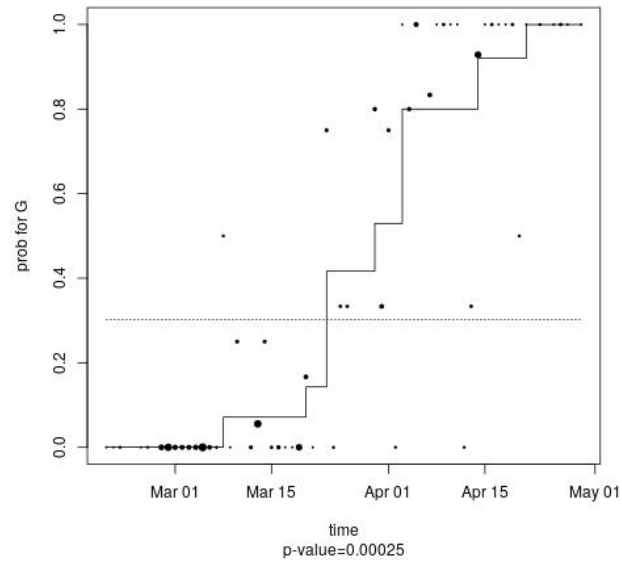

USA\_New-York\_Manhattan

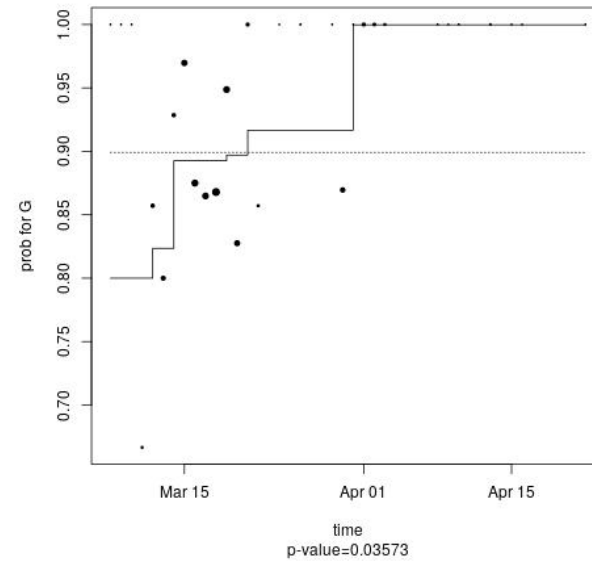

USA\_New-York\_Brooklyn

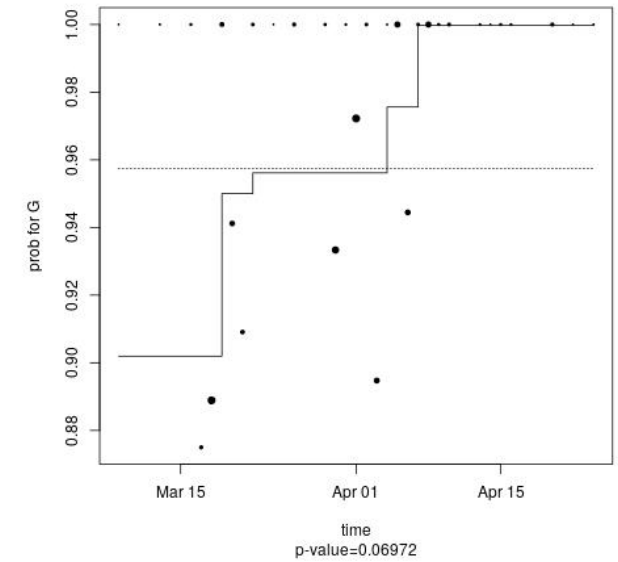

# D614 to G614 Transitions Over Time by City Part 2

USA\_California\_Santa-Clara

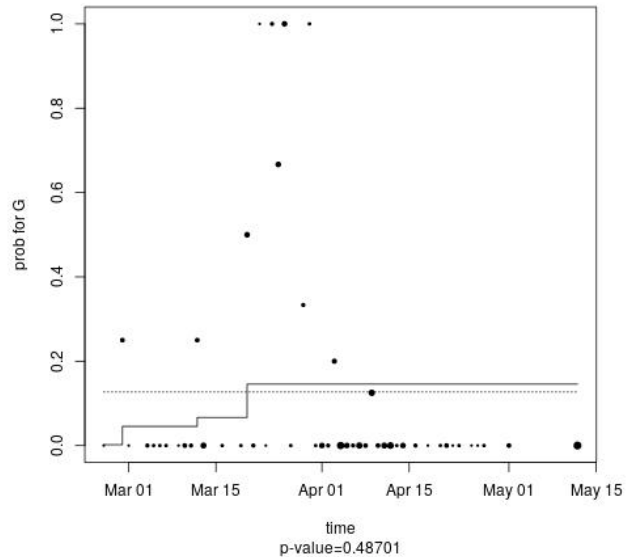

USA\_California\_San-Francisco

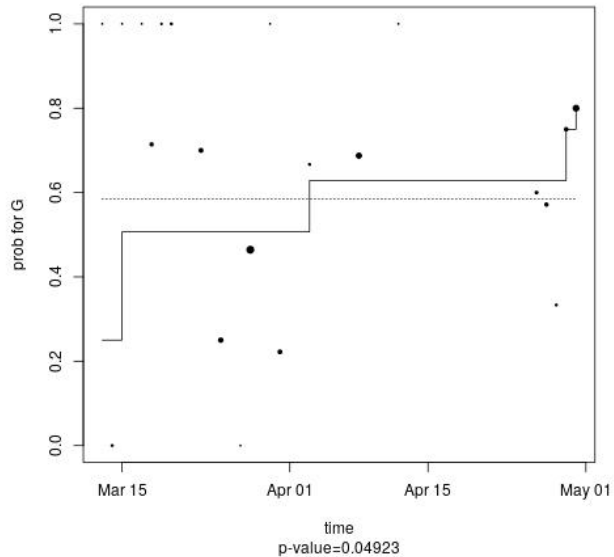

USA\_California\_San-Diego

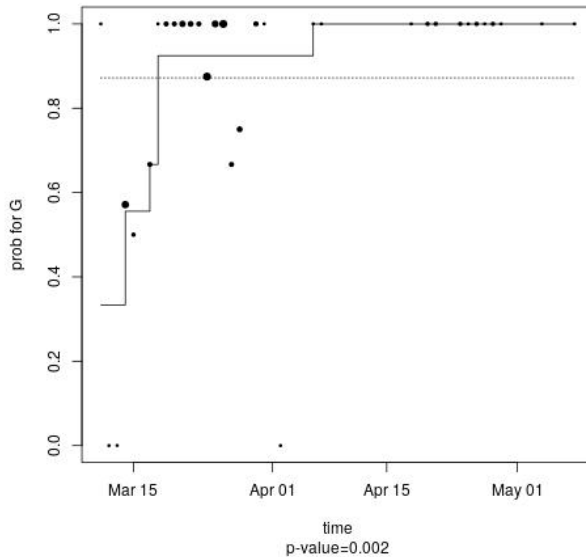

United-Kingdom\_England\_SHEF

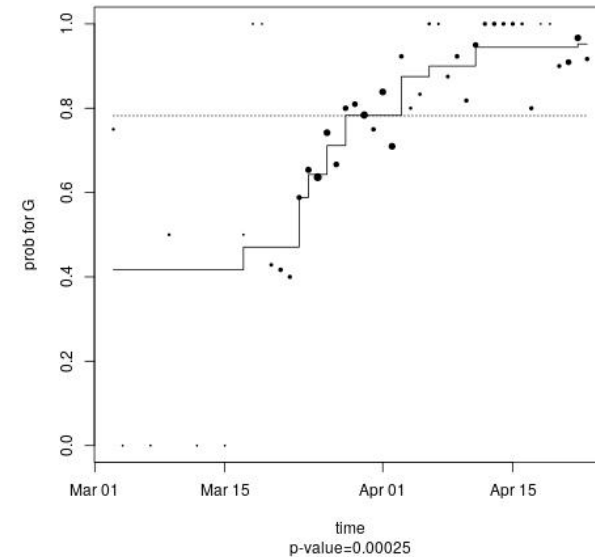

United-Kingdom\_England\_NOTT

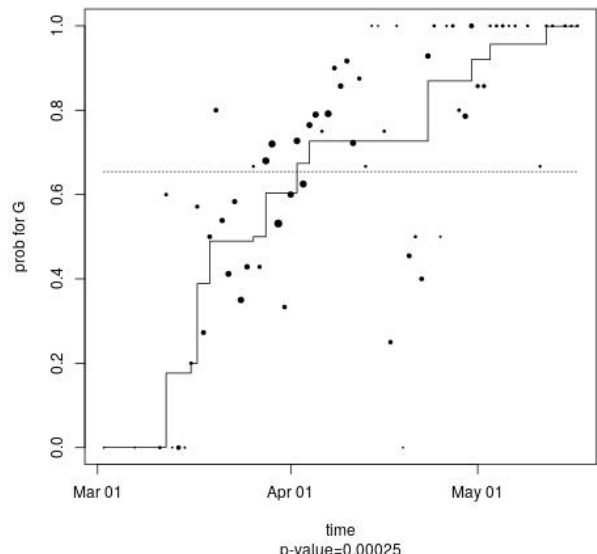

United-Kingdom\_England\_NORW

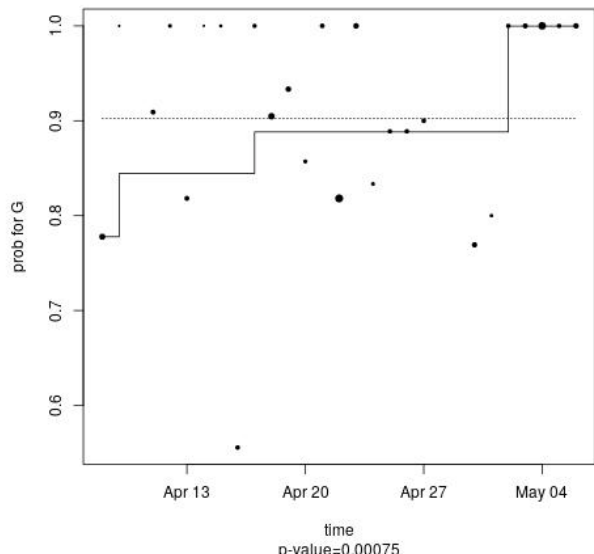

United-Kingdom\_England\_LOND

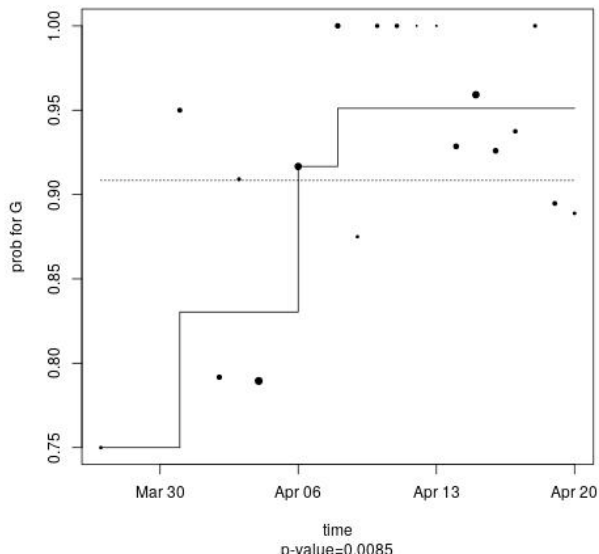

United-Kingdom\_England\_LIVE

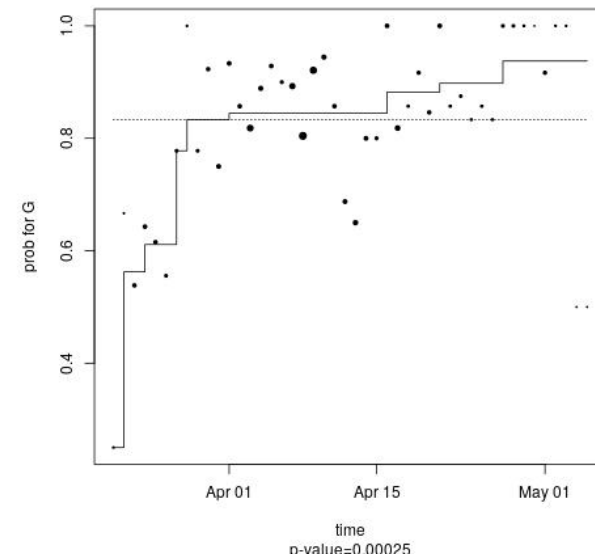

# D614 to G614 Transitions Over Time by City Part 3

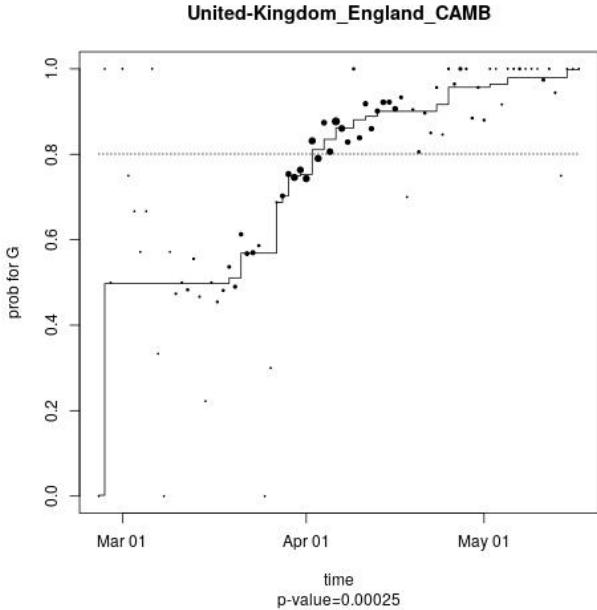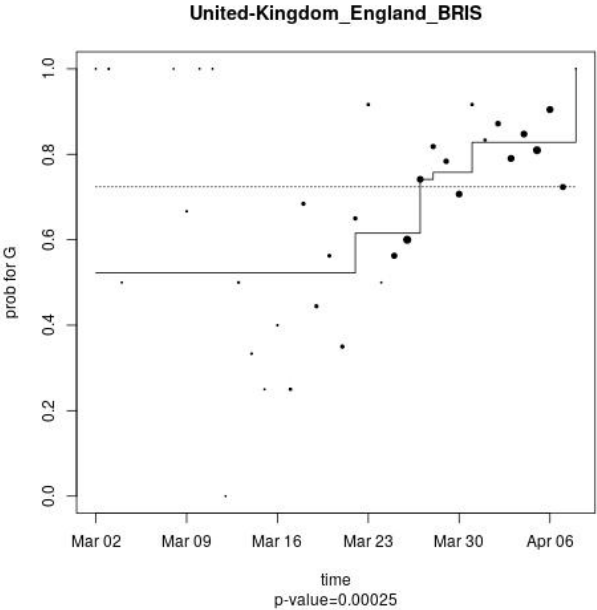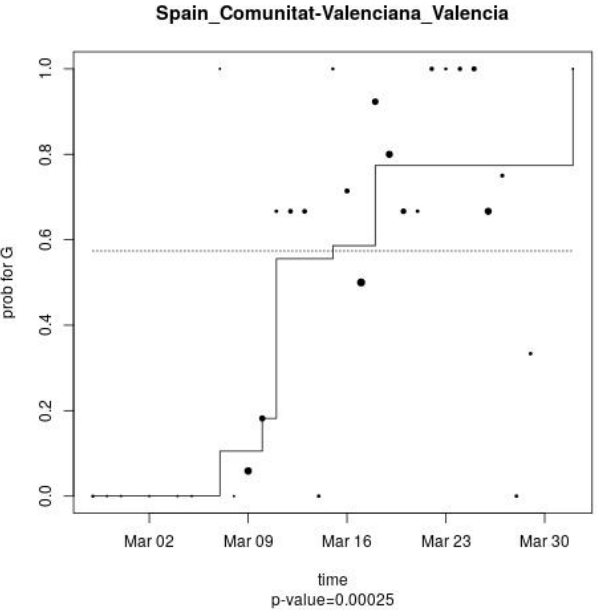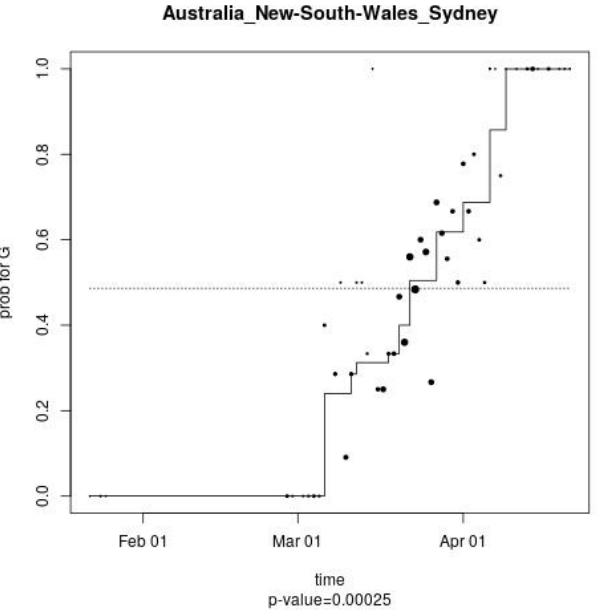

Supplement: mmc3.pdf [file mmc3.pdf]
